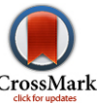

# Functional Roles of the Dimer-Interface Residues in Human Ornithine Decarboxylase

Chien-Yun Lee<sup>1,2,3</sup>, Yi-Liang Liu<sup>1,4</sup>, Chih-Li Lin<sup>5</sup>, Guang-Yaw Liu<sup>4\*</sup>, Hui-Chih Hung<sup>1,6,7\*</sup>

**1** Department of Life Sciences, National Chung-Hsing University, Taichung, Taiwan, **2** Graduate Institute of Biotechnology, National Chung-Hsing University, Taichung, Taiwan, **3** Molecular and Biological Agricultural Sciences Program, Taiwan International Graduate Program, Academia Sinica, Taipei, Taiwan, **4** Institute of Microbiology and Immunology and Division of Allergy, Immunology and Rheumatology, Chung Shan Medical University and Hospital, Taichung, Taiwan, **5** Institute of Medicine, Chung Shan Medical University, Taichung, Taiwan, **6** Institute of Genomics and Bioinformatics, National Chung-Hsing University, Taichung, Taiwan, **7** Agricultural Biotechnology Center (ABC), National Chung-Hsing University (NCHU), Taichung, Taiwan

## Abstract

Ornithine decarboxylase (ODC) catalyzes the decarboxylation of ornithine to putrescine and is the rate-limiting enzyme in the polyamine biosynthesis pathway. ODC is a dimeric enzyme, and the active sites of this enzyme reside at the dimer interface. Once the enzyme dissociates, the enzyme activity is lost. In this paper, we investigated the roles of amino acid residues at the dimer interface regarding the dimerization, protein stability and/or enzyme activity of ODC. A multiple sequence alignment of ODC and its homologous protein antizyme inhibitor revealed that 5 of 9 residues (residues 165, 277, 331, 332 and 389) are divergent, whereas 4 (134, 169, 294 and 322) are conserved. Analytical ultracentrifugation analysis suggested that some dimer-interface amino acid residues contribute to formation of the dimer of ODC and that this dimerization results from the cooperativity of these interface residues. The quaternary structure of the sextuple mutant Y331S/Y389D/R277S/D332E/V322D/D134A was changed to a monomer rather than a dimer, and the  $K_d$  value of the mutant was 52.8  $\mu$ M, which is over 500-fold greater than that of the wild-type ODC (ODC\_WT). In addition, most interface mutants showed low but detectable or negligible enzyme activity. Therefore, the protein stability of these interface mutants was measured by differential scanning calorimetry. These results indicate that these dimer-interface residues are important for dimer formation and, as a consequence, are critical for enzyme catalysis.

**Citation:** Lee C-Y, Liu Y-L, Lin C-L, Liu G-Y, Hung H-C (2014) Functional Roles of the Dimer-Interface Residues in Human Ornithine Decarboxylase. PLoS ONE 9(8): e104865. doi:10.1371/journal.pone.0104865

**Editor:** Andreas Hofmann, Griffith University, Australia

**Received:** March 29, 2014; **Accepted:** July 13, 2014; **Published:** August 20, 2014

**Copyright:** © 2014 Lee et al. This is an open-access article distributed under the terms of the Creative Commons Attribution License, which permits unrestricted use, distribution, and reproduction in any medium, provided the original author and source are credited.

**Data Availability:** The authors confirm that all data underlying the findings are fully available without restriction. All relevant data are within the paper and its Supporting Information files.

**Funding:** This work was supported by the Ministry of Science and Technology (<http://web1.most.gov.tw/>), ROC (NSC 102-2321-B-005-008 to HCH) and in part by the Ministry of Education, Taiwan, R.O.C. under the ATU plan. The funders had no role in study design, data collection and analysis, decision to publish, or preparation of the manuscript.

**Competing Interests:** The authors have declared that no competing interests exist.

\* Email: hchung@dragon.nchu.edu.tw (HCH); liugy@csmu.edu.tw (GYL)

## Introduction

Ornithine decarboxylase (ODC, EC 4.1.1.17) is universally found in organisms ranging from bacteria to humans. ODC catalyzes the pyridoxal 5-phosphate (PLP)-dependent decarboxylation of ornithine to putrescine, and it is the first and the rate-limiting, enzyme in polyamine biosynthesis [1–4]. ODC and cellular polyamines play significant roles in numerous biological functions, including embryonic development, the cell cycle, and cell proliferation, differentiation and apoptosis [5–11]. Because of their biological roles, polyamines have been linked with several cancers [5,12–21]. Furthermore, because ODC activity and the cellular levels of polyamine are crucial for cell proliferation [9] and are critical for the initiation and progression of neoplastic diseases [2,22], ODC has been recognized as an oncogenic enzyme. Thus, ODC inhibitors and negative regulators of the polyamine pathway could be beneficial for the treatment of many cancers [3,7].

ODC is a homodimer with 2-fold symmetry [23,24], and each subunit has its own active site. Dimerization is critical for the enzymatic function of ODC because the active site of each subunit is located at the dimer interface [25,26]. Structural data

demonstrate that the two active sites of ODC are formed by the N-terminus of one subunit, which contains the residues involved in PLP interactions, and the C-terminus of the other subunit, which contains the residues involved in substrate binding [23,27–34].

The cellular levels of ODC are highly regulated through an exclusive ubiquitin-independent pathway [5]. The enzyme undergoes degradation by directly interacting with its regulatory protein antizyme (AZ) [35]. The binding of AZ to ODC promotes the dissociation of the ODC homodimers and the subsequent formation of an AZ-ODC heterodimer, which is enzymatically inactive [36–39]. Thus, AZ inactivates ODC by forming inactive AZ-ODC heterodimers. In addition, AZ targets ODC for degradation via the 26S proteasome [40–42]. Therefore, the primary role of AZ is to regulate polyamine metabolism through inhibition of ODC activity and polyamine transport, thus restricting polyamine levels [5,35,43,44]. Because increased ODC activity is associated with most human malignancies [2], AZ has been suggested as a tumor suppressor; thus, AZ has potential in the development of protein drugs. Our recent studies have indicated that a minimally functional AZ peptide, AZ<sub>95-</sub>

176, inhibits ODC enzyme activity as effectively as the full-length AZ protein [45].

A regulatory protein termed the antizyme inhibitor (AZI) is an antagonist of AZ. AZI positively regulates ODC, which is down-regulated by AZ. AZI is homologous to ODC but does not show decarboxylase activity [46]. AZI binds to AZ more tightly than ODC and rescues ODC from the AZ-ODC complex [47]. The dissociation constant ( $K_d$ ) of the AZ-ODC complex is approximately 0.2  $\mu\text{M}$ , while that of the AZ-AZI complex is approximately 0.02  $\mu\text{M}$ . Thus, there is a 10-fold difference between the binding affinities of AZ-AZI and AZ-ODC [48]. As a result, AZI restores ODC activity [47–49] and prevents proteasomal degradation of ODC. The factors governing the differential binding affinities of human ODC and AZI have been identified [48]; differences in residues 125 and 140 of ODC and AZI are responsible for the differential AZ-binding affinities [48].

Structural studies indicate that both ODC and AZI form dimers when crystallized [23,50]; however, ODC exists as a dimer in solution, with a  $K_d$  value of approximately 0.18  $\mu\text{M}$ , whereas AZI exists as a monomer-dimer equilibrium, with a  $K_d$  value of approximately 84  $\mu\text{M}$ . Thus, the self-association of the subunits of these two proteins differs by greater than 400-fold [49]. The AZI dimer has fewer interactions than the ODC dimer and lacks symmetric interactions between residues at the dimer interface [50]. We have identified the critical amino acid residues responsible for the difference in dimer formation between ODC and AZI.

Here, we continue to discuss how ODC forms such a stable dimer and the factors determining dimer formation. In addition, we discuss the role of these interface residues in protein stability. Previous studies of trypanosomal ODC have revealed that no single, unique dimer-interface residue is critical for the dimerization [26]. In this study, a series of dimer-interface mutants of ODC were created. Kinetic experiments and biophysical studies, including analytical ultracentrifugation (AUC) and differential scanning calorimetry (DSC), were employed. Our data indicated that ODC dimerization results from the cooperativity of these interface residues. In addition, we propose that these dimer-interface residues are also critical for protein stability and enzyme activity.

## Results

The structure of human ODC indicates that some amino acid residues in the dimer interface may play significant roles in either dimer formation or enzyme activity (Figure 1A). Previous studies have indicated that ODC exists as a stable dimer, with a dissociation constant ( $K_d$ ) of 0.18  $\mu\text{M}$ , whereas AZI is in a rapid equilibrium between the monomer and the dimer, with a  $K_d$  value of 84  $\mu\text{M}$  [49]. In this study, we explored the functional roles of the dimer-interface residues that may contribute to dimerization of the enzyme, enzyme activity and protein stability. The five distinctive amino acid residues in ODC were changed to the corresponding residues in AZI: R165E, R277S, Y331S, D332E and Y389D (Figure 1B). Four conserved residues were mutated as follows: Val322 was changed to aspartate (V322D), and Asp134, Lys169 and Lys294 were each changed to alanine (D134A, K169A and K294A).

### The kinetic properties of wild-type and dimer-interface mutants of human ODC

First, the kinetic parameters of wild-type (WT) human ODC and the 9 enzymes with the single mutations were determined, and the  $k_{\text{cat}}$  values of the WT and dimer-interface mutants found to be

quite different (Table 1). The  $k_{\text{cat}}$  of the WT was approximately 225  $\text{min}^{-1}$ . Compared with the WT, the non-conserved mutants (R277S, Y331S and Y389D) and the conserved mutants (D134A, K169A and K294A) showed low  $k_{\text{cat}}$  values and decreased catalytic activity. The  $k_{\text{cat}}$  values of K169A, R277S, K294A and Y331S were 27, 21, 33 and 40  $\text{min}^{-1}$ , respectively, which were only 10% to 27% of the WT turnover number. Furthermore, the enzyme activities of D134A, V322D and Y389D were negligible, as indicated by their  $k_{\text{cat}}$  values. These results demonstrate the significance of these dimer-interface residues for enzyme activity. Other single mutants, such as R165E and D332E, displayed  $k_{\text{cat}}$  values (257 and 177  $\text{min}^{-1}$ , respectively) comparable to that of WT, suggesting that these residues were much less important for the function of the enzyme.

### Size distribution analysis of the WT and dimer-interface mutants of human ODC

The size distributions of the WT and the 9 single mutants of human ODC were examined (Figure 2A for WT, Figure 2C for Y331S and Figure S1 for the other mutants), and the dissociation constants of these single mutants were determined by global fitting of the sedimentation velocity data (Table 2). The  $K_d$  value of the WT ODC was 0.1  $\mu\text{M}$ . The sedimentation plots and the  $K_d$  values of the ODC single mutants indicated that no individual residue significantly interrupted the ODC dimer interface. Most single mutants still successfully maintained dimers with a  $K_d$  value similar to that of the WT (Figure S1; Table 2). The single mutant Y331S displayed a 10-fold higher  $K_d$  than the WT; and a small amount of monomers was present. The single mutants V322D and Y389D had  $K_d$  values approximately 6-fold greater than that of the WT (Table 2). These data imply that interacting forces exist among these particular residues and that these forces may drive dimer formation in ODC. Thus, double, triple, quadruple, quintuple and sextuple mutants were subsequently created in various combinations.

We have shown that an AZI quadruple mutant, AZI\_S331Y/D389Y/S277R/E332D, is a stable dimer, similar to the dimeric ODC, with a dissociation constant of approximately 0.1  $\mu\text{M}$ . Figure 2 shows the size-distribution plots for ODC\_WT, ODC\_Y331S, ODC\_Y331S/Y389D, ODC\_Y331S/Y389D/R277S and ODC\_Y331S/Y389D/R277S/D332E (ODC\_4M). Although the single mutation of Tyr331 to Ser (ODC\_Y331S) or Tyr389 to Asp (ODC\_Y389D) in ODC resulted in a  $K_d$  value (1.1 and 0.69  $\mu\text{M}$ , respectively, Table 2) larger than that of the WT (0.1  $\mu\text{M}$ ), there was no difference in the  $K_d$  values between the WT and ODC\_Y331S/Y389D (0.1 and 0.16  $\mu\text{M}$ , respectively, Table 2). ODC\_Y331S/Y389D/R277S displayed a small shift in the monomer-dimer equilibrium (Figure 2E), with a  $K_d$  value of 1.03  $\mu\text{M}$  (Table 2), which was very similar to that of ODC\_Y331S (Figure 2C). The ODC dimer clearly dissociated when D332E was added to the ODC\_Y331S/Y389D/R277S triple mutant. However, although the  $K_d$  value of the ODC\_S331Y/D389Y/S277R/D332E quadruple mutant was 160-fold greater than that of the WT (15.9  $\mu\text{M}$  versus 0.1  $\mu\text{M}$ , Table 2), the quadruple mutant still existed predominantly in dimeric form (Figure 2F). Thus, although the AZI quadruple mutant S331Y/D389Y/S277R/E332D behaved as a dimer, the corresponding ODC quadruple mutant did not primarily exist in its monomeric form. We therefore continued to examine other interface residues that could affect ODC dimerization appreciably.

Three cationic amino acid residues in ODC, Arg165, Lys169 and Lys294, were substituted individually with Glu, Ala and Ala in ODC\_4M. The quintuple mutant [ODC\_4M]+R165E showed a pattern similar to that of ODC\_4M (Figure 3B), with a  $K_d$  value of

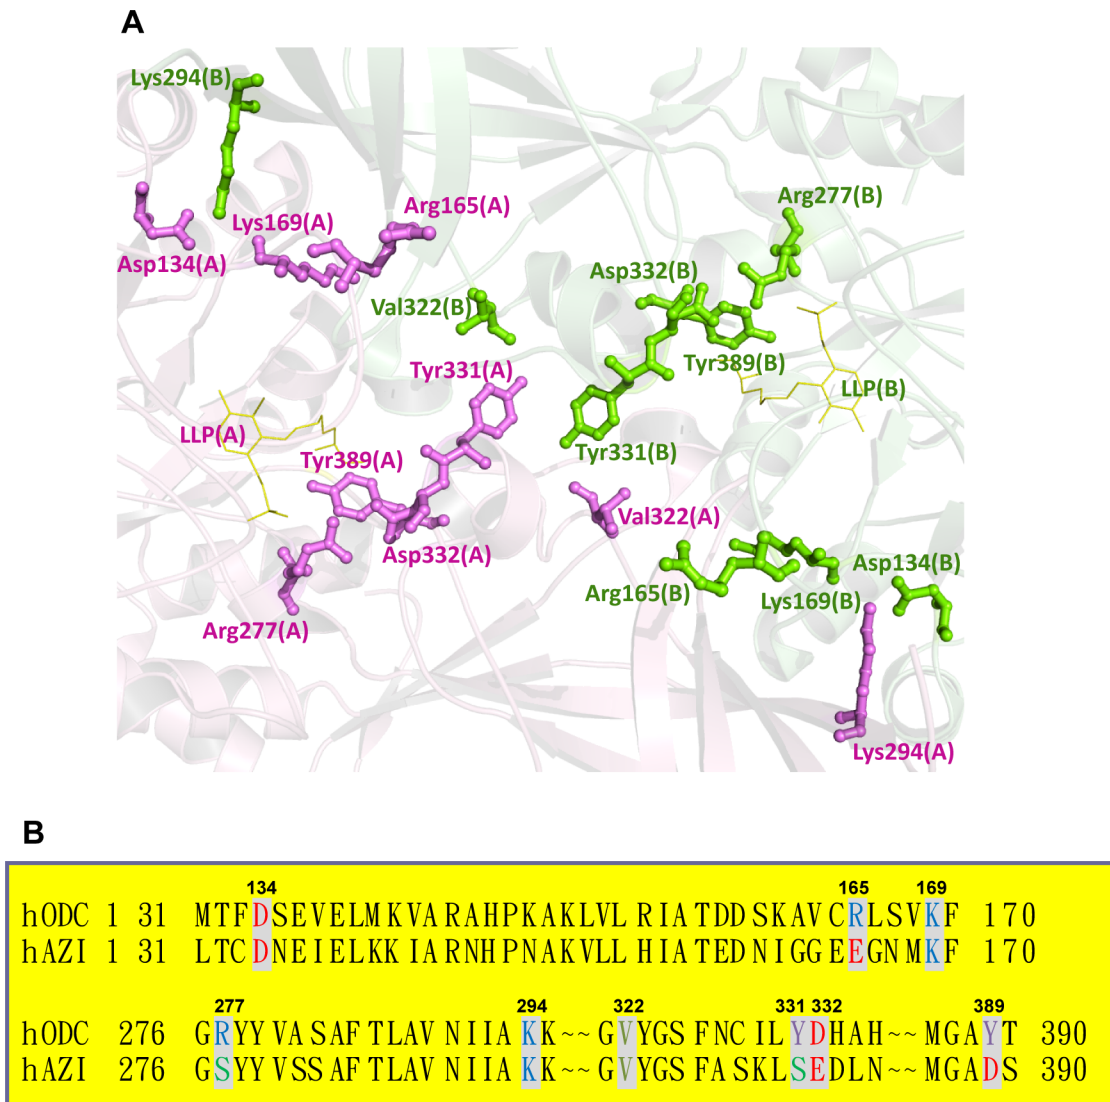

**Figure 1. Amino acid residues at the dimer interface of human ornithine decarboxylase.** (A) The dimer-interface residues and the cofactor PLP analog, LLP (PDB code 1D7K), at the dimer interface of ODC. These residues are shown as a ball-and-stick model; the residues of one subunit are shown in blue, and those of the other subunit are shown in pink. This figure was generated using PyMOL [57]. (B) Pairwise sequence alignments between human ODC and AZI at the dimer interface.  
doi:10.1371/journal.pone.0104865.g001

13.5  $\mu$ M, which was comparable to that of ODC<sub>4M</sub> (Table 2). The other two quintuple mutants, [ODC<sub>4M</sub>]+K169A and [ODC<sub>4M</sub>]+K294A, did not show a notable shift in the monomer-dimer equilibria (Figure 3, C and D, respectively); their  $K_d$  values were 1.49 and 0.26  $\mu$ M, respectively (Table 2), which were similar to that of ODC<sub>Y331S</sub> (Figure 2C). This result indicated that Arg165, Lys169 and Lys294 have little effect on ODC dimerization.

A conserved hydrophobic amino acid residue, Val322, had an appreciable effect on ODC dimerization. In the current study, Val322 was changed to Asp to interrupt the hydrophobicity at the dimer interface. When V322D was added to ODC<sub>4M</sub>, the resulting quintuple mutant clearly showed a monomer-dimer equilibrium (Figure 4B) compared with ODC<sub>4M</sub> (Figure 2F); the  $K_d$  of [ODC<sub>4M</sub>]+V322D was 25.2  $\mu$ M (Table 2), which was 1.6-fold larger than that of ODC<sub>4M</sub>. This result indicated that Val322 had a positive effect on ODC dimerization.

A conserved amino acid residue at the dimer interface, Asp134, was also examined for its contribution to the dimerization of ODC. The  $K_d$  value of [ODC<sub>4M</sub>]+D134A was approximately 13.3  $\mu$ M (Figure 4C), which was not significantly different from that of ODC<sub>4M</sub> (Table 2). However, when both V322D and D134A were added to ODC<sub>4M</sub>, the resulting sextuple mutant demonstrated a significant shift from dimer to monomer (Figure 4D); the  $K_d$  value of [ODC<sub>4M</sub>]+[V322D/D134A] was 52.8  $\mu$ M (Table 2), which was over 500-fold greater than that of ODC<sub>WT</sub>. For this mutant, the predominant form was the monomer rather than the dimer, further demonstrating the synergistic effect of these interface residues on the formation of the dimer of ODC.

**Table 1.** Kinetic parameters of human ornithine decarboxylases.

| ODC Variants      | $K_{m, \text{ornithine}}$ (mM) | $k_{\text{cat}}$ ( $\text{min}^{-1}$ ) |
|-------------------|--------------------------------|----------------------------------------|
| WT                | $0.37 \pm 0.09$                | $225 \pm 16$                           |
| D134A             | $3.54 \pm 1.05$                | $4.2 \pm 0.3$                          |
| R165E             | $0.55 \pm 0.09$                | $257 \pm 14$                           |
| K169A             | $0.35 \pm 0.06$                | $27 \pm 1.5$                           |
| R277S             | $0.37 \pm 0.16$                | $21 \pm 1.2$                           |
| K294A             | $0.28 \pm 0.02$                | $33 \pm 0.6$                           |
| V322D             | $0.43 \pm 0.05$                | $4.5 \pm 0.5$                          |
| Y331S             | $0.39 \pm 0.09$                | $40 \pm 3.0$                           |
| D332E             | $0.42 \pm 0.10$                | $177 \pm 13$                           |
| Y389D             | N.D.                           | N.D.                                   |
| Y331S/Y389D       | N.D.                           | N.D.                                   |
| Y331S/Y389D/R277S | N.D.                           | N.D.                                   |

\*N.D. indicates that the enzyme activity was not detectable.  
doi:10.1371/journal.pone.0104865.t001

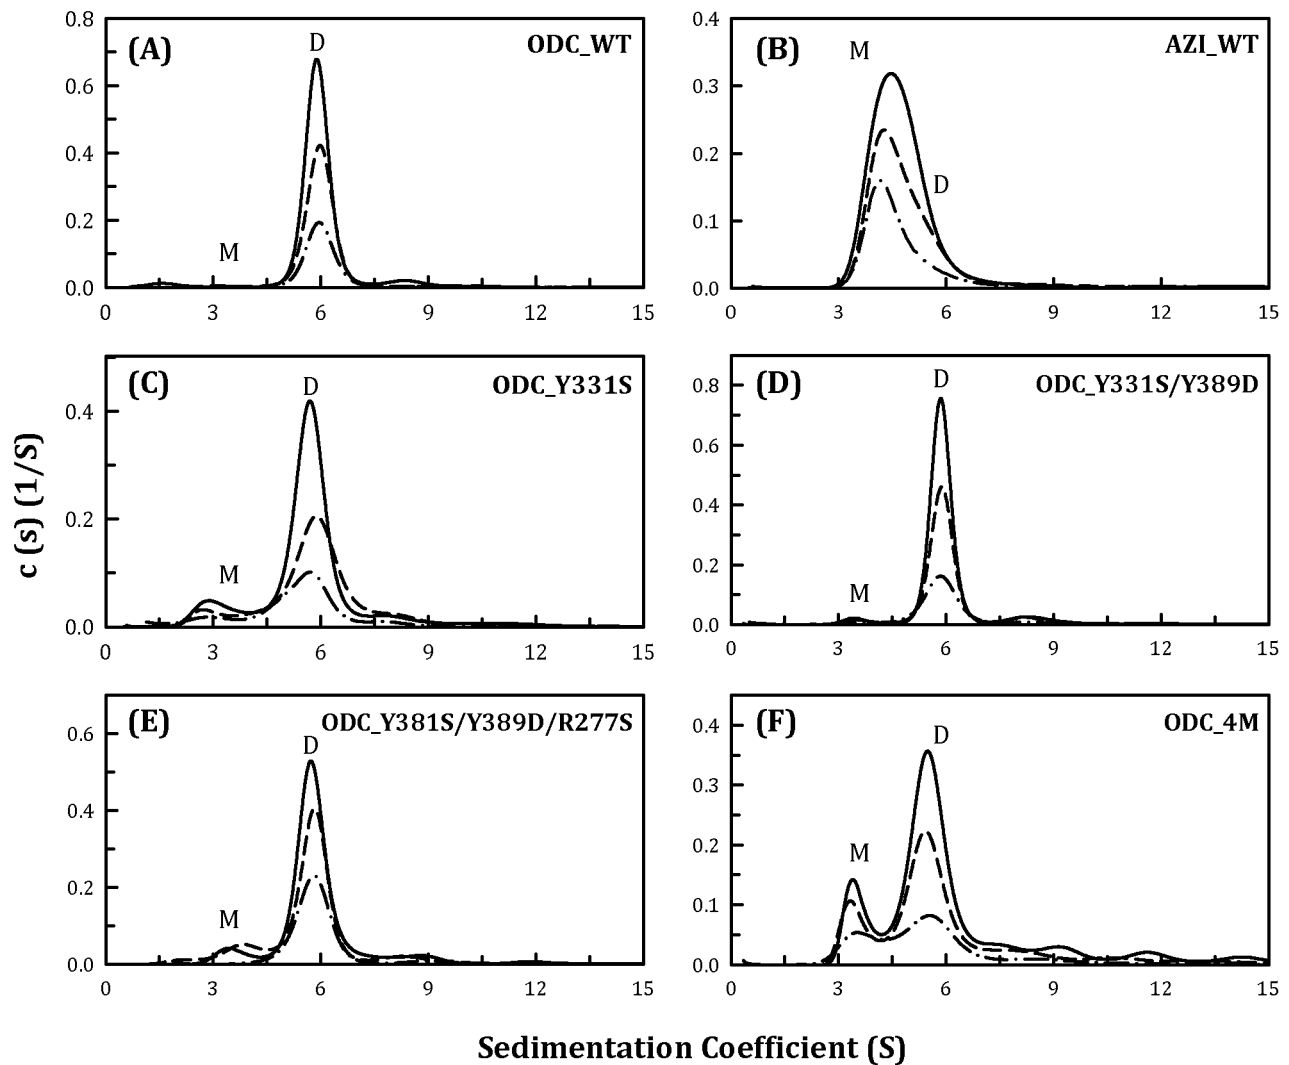

**Figure 2. Continuous sedimentation coefficient distribution of the human ODC\_WT and the single, double, triple and quadruple mutants.** The three protein concentrations (from top to bottom) were 0.3, 0.6 and 0.9 mg/ml. (A) ODC\_WT; (B) AZI; (C) ODC\_Y331S; (D) ODC\_Y331S/Y389D; (E) ODC\_Y331S/Y389D/R277S; and (F) ODC\_Y331S/Y389D/R277S/D332E (ODC\_4M). M, monomer; D, dimer.  
doi:10.1371/journal.pone.0104865.g002

**Table 2.** Dissociation constants for the dimer-monomer equilibrium of human ornithine decarboxylases.

| ODC Variants                        | $K_d$ ( $\mu\text{M}$ ) |
|-------------------------------------|-------------------------|
| WT                                  | 0.10±0.001              |
| D134A                               | 0.12±0.012              |
| R165E                               | 0.11±0.001              |
| K169A                               | 0.30±0.008              |
| R277S                               | 0.08±0.006              |
| K294A                               | 0.10±0.008              |
| V322D                               | 0.56±0.012              |
| Y331S                               | 1.10±0.008              |
| D332E                               | 0.03±0.007              |
| Y389D                               | 0.69±0.005              |
| Y331S/Y389D                         | 0.16±0.001              |
| Y331S/Y389D/R277S                   | 1.03±0.004              |
| Y331S/Y389D/R277S/D332E             | 15.9±0.08               |
| Y331S/Y389D/R277S/D332E/R165E       | 13.5±0.45               |
| Y331S/Y389D/R277S/D332E/D134A       | 13.3±0.04               |
| Y331S/Y389D/R277S/D332E/K169A       | 1.49±0.04               |
| Y331S/Y389D/R277S/D332E/K294A       | 0.26±0.06               |
| Y331S/Y389D/R277S/D332E/V322D       | 25.2±0.03               |
| Y331S/Y389D/R277S/D332E/V322D/D134A | 52.8±0.50               |
| AZI                                 | 72.3±0.70               |

\*The  $K_d$  value was derived from global data fitting of the sedimentation velocity using three different ODC concentrations (Figures 2–4 and Figure S1).  
doi:10.1371/journal.pone.0104865.t002

### DSC scanning study of the WT and dimer-interface mutants of human ODC

We analyzed the protein stability of WT ODC and AZI using the differential scanning calorimetric technique, and the melting temperature values ( $T_m$ ) are shown in Table 3. The DSC scanning plot of ODC\_WT was a multiple curve with several  $T_m$  values (Figure 5A, solid curve); after appropriate fitting, the curve can be divided into three sub-curves with  $T_m$  values of 48, 56 and 67°C (Figure 5A, dashed curves; Table 3). The DSC scanning plot of AZI was also not a simple curve (Figure 5B, solid curve). After curve fitting, we observed a multiple curve consisting of two sub-curves with  $T_m$  values of 45 and 55°C (Figure 5B, dashed curves; Table 3). ODC and AZI have very similar structural folds [50]; however, ODC is a dimer, whereas AZI predominantly exists as monomers (Figure 2A and 2B, respectively). Therefore, one of the three  $T_m$  values of ODC may represent stable subunit-subunit interactions, while the other two may contribute to the conformational stability of the ODC and AZI monomers.

The protein stabilities of the ODC interface mutants were also determined. The DSC scanning plot of the R165E mutant was quite similar to that of the WT (Figure S2B, solid curve), and the  $T_m$  values were approximately 44, 51 and 61°C (Table 3), which were 5°C less than those of the WT. Because the  $K_d$  and kinetic properties ( $K_m$  and  $k_{cat}$ ) of R165E were not different from those of the WT, the amino acid substitution of R with E did not have a significant effect on the structure and enzymatic function of ODC.

The single mutants D134A, K169A, R277S, Y331S and D332E each showed three  $T_m$  values; however, one  $T_m$  value (designated as  $T_{m1}$ ) was significantly lower than that of the WT by approximately 7–13°C (Table 3). In addition, the patterns of their DSC scanning plots were changed from that of the WT (Figure S2, C–G, solid curve). Although their  $K_d$  values were not significantly

altered, their  $k_{cat}$  values were substantially smaller. Therefore, the  $T_{m1}$  value of ODC may signify inter-subunit stability, and the decrease in the  $k_{cat}$  and catalytic activity of the enzyme may be associated with a reduction in  $T_{m1}$ .

The  $T_m$  values of the single mutants K294A, V322D and Y389D were significantly (8–16 K) lower than that of the WT enzyme (Table 3). Additionally, the patterns of the scanning plots were altered (Figure S2, H–J). In addition, the multiple mutants ODC\_Y331S/Y389D and ODC\_Y331S/Y389D/R277S showed similar changes in  $T_m$  values (Table 3) and scanning patterns (Figure 6B and 6C, respectively). These results indicated that the overall conformational stability of ODC was noticeably altered by these mutations and that the negligible catalytic activity of these mutant enzymes could be attributed to changes in the enzyme conformation.

The most interesting phenomenon observed in the DSC study was the dramatic difference in the  $T_m$  value between ODC\_Y331S/Y389D/R277S/D332E (ODC\_4M) and [ODC\_4M]+V322D. ODC\_4M had three  $T_m$  values, while [ODC\_4M]+V322D had only two  $T_m$  values (Figure 6D and 6E, respectively). The  $T_m$  values for ODC\_4M were 37, 48 and 56°C, and those for [ODC\_4M]+V322D were 40 and 50°C (Table 3). Because the monomer-dimer equilibrium shifted between ODC\_4M and [ODC\_4M]+V322D, with an increase in  $K_d$  value (15.9  $\mu\text{M}$  and 25.2  $\mu\text{M}$ , respectively, Table 2), the loss of  $T_{m1}$  indicated dissociation of the ODC dimer into monomers, similar to ODC and AZI (Figure 5). Indeed, the quintuple mutant Y331S/Y389D/R277S/D332E/V322D showed a significant shift in the monomer-dimer equilibrium (Figure 4B) and the absence of  $T_{m1}$  (Table 3).

An ODC sextuple mutant, [ODC\_4M]+[V322D/D134A], had  $T_m$  values of 44 and 59°C (Table 3). The size distribution analysis

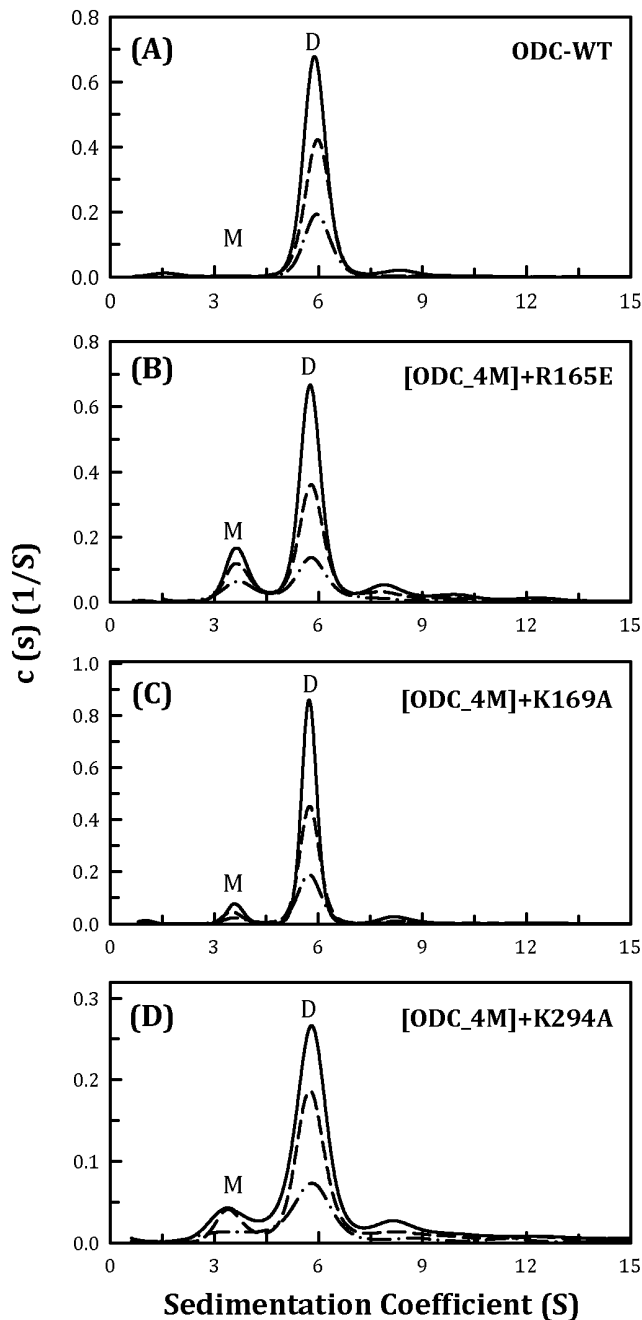

**Figure 3. Continuous sedimentation coefficient distribution of the human ODC\_WT and the ODC\_4M mutants with R165E, K169A and K294A.** The three protein concentrations (from top to bottom) were 0.3, 0.6 and 0.9 mg/ml. (A) ODC\_WT; (B) [ODC\_4M]+R165E; (C) [ODC\_4M]+K169A; and (D) [ODC\_4M]+K294A. M, monomer; D, dimer.  
doi:10.1371/journal.pone.0104865.g003

of this mutant enzyme showed that monomers were predominant at equilibrium, with a  $K_d$  value of 52.8  $\mu$ M (Table 2). This finding coincided with two  $T_m$  values associated with dissociation of the mutant enzyme.

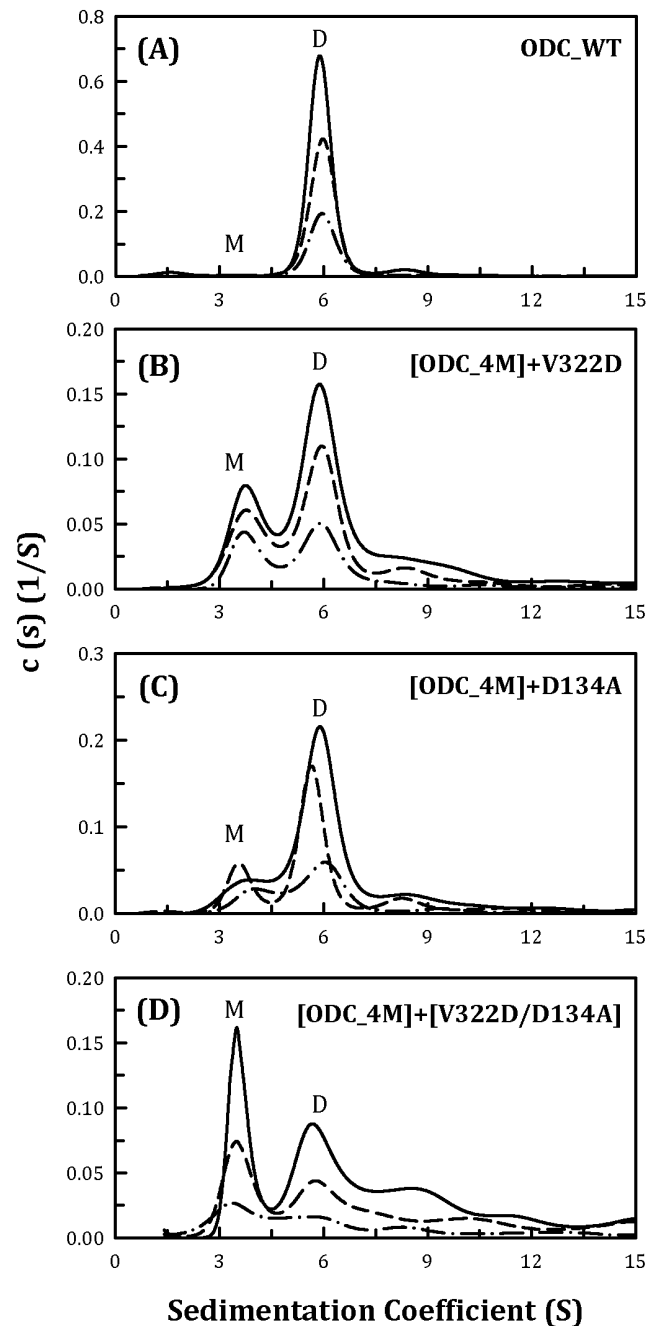

**Figure 4. Continuous sedimentation coefficient distribution of the human ODC\_WT and the ODC\_4M mutants with D134A and V322D.** The three protein concentrations (from top to bottom) were 0.3, 0.6 and 0.9 mg/ml. (A) ODC\_WT; (B) [ODC\_4M]+V322D; (C) [ODC\_4M]+D134A; and (D) [ODC\_4M]+[V322D/D134A]. M, monomer; D, dimer.  
doi:10.1371/journal.pone.0104865.g004

## Discussion

ODC functions as a dimer, and this form is required for its decarboxylase activity [23,24]. In this work, we determined the roles of the amino acid residues at the dimer interface. Our results indicated that most of the dimer-interface amino acid residues are important for the stability of the enzyme and contribute to the subunit-subunit interactions and/or the conformational stability of



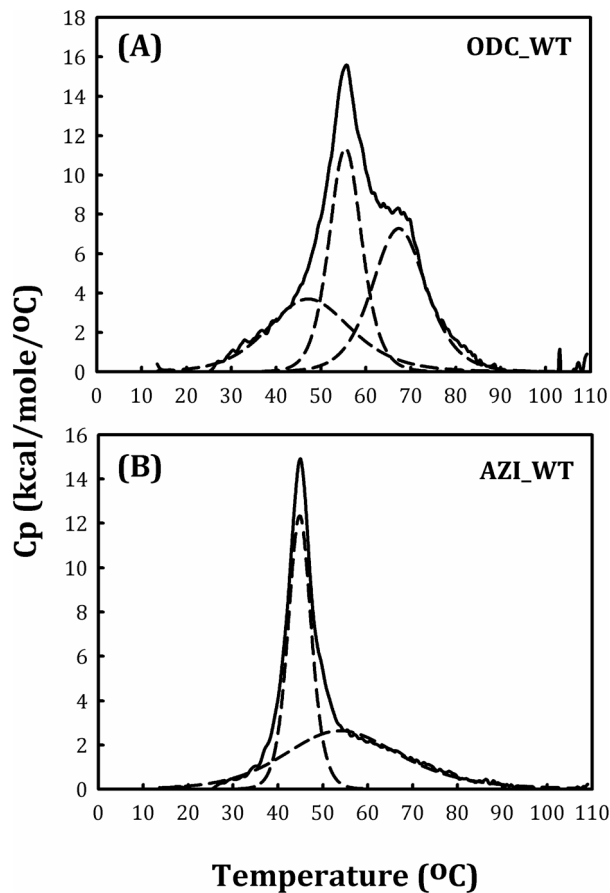

**Figure 5. DSC scanning plot of the human ODC and AZI.** The protein concentration was 0.75 mg/ml in 30 mM sodium acetate buffer (pH 7.0). (A) ODC\_WT and (B) AZI.  
doi:10.1371/journal.pone.0104865.g005

the monomers. The significant effects of certain interface residues on enzyme activity may be attributed to their role in dimer formation. In addition, the data from the AUC and DSC studies illustrate the differences in the dimeric enzyme and its homolog with respect to dimerization, enzyme activity and protein stability.

#### Factors that affect the dimerization of ODC

Size-distribution analysis of the ODC interface mutants clearly indicates that dimer formation is a result of the cooperative behavior of the interface residues. The structure of human ODC suggests the importance of the hydrophobic interactions involving Tyr331 and Val322 at the dimer interface. Mutating Y331S or V322D in ODC results in a minimal shift in the equilibrium from the dimeric to the monomeric form, with a  $K_d$  value that is over 5-fold greater than that of the WT. Tyr389 may also be crucial for dimerization because its  $K_d$  value was 7-fold higher than that of the WT (Table 2).

The single mutations of Arg277 and Asp332 showed  $K_d$  values that were smaller than that of the WT (Table 2). However, these mutations contributed to dimerization because the  $K_d$  value of ODC\_Y331S/Y389D/R277S/D332E was 100-fold larger than that of ODC\_Y331S/Y389D (Table 2). The structure of ODC shows ionic interactions between Arg277 and Asp332 in the same subunit; this ion pair should contribute to formation at the dimer interface.

Three conserved amino acid residues at the dimer interface of ODC and AZI were examined for their contribution to dimer formation. The structure of ODC shows that Asp134, Lys169 and Lys294 compose a region with an electrostatic network. Our data suggest that ionic interactions involving Asp134 influence dimer formation because the  $K_d$  value of ODC\_Y331S/Y389D/R277S/D332E/V322D/D134A was 2-fold greater than that of ODC\_Y331S/Y389D/R277S/D332E/V322D (Table 2).

**Table 3. Melting temperatures of WT and mutant human ornithine decarboxylase.**

| ODC Variants                        | $T_{m1}$ (°C) | $\Delta T_{m1(WT-mut)}$ | $T_{m2}$ (°C) | $\Delta T_{m2(WT-mut)}$ | $T_{m3}$ (°C) | $\Delta T_{m3(WT-mut)}$ |
|-------------------------------------|---------------|-------------------------|---------------|-------------------------|---------------|-------------------------|
| WT                                  | 48±3.3        | 0                       | 56±0.1        | 0                       | 67±0.3        | 0                       |
| R165E                               | 44±1.7        | -4                      | 51±0.2        | -5                      | 61±0.2        | -6                      |
| D134A                               | 37±0.6        | -11                     | 52±0.3        | -4                      | 62±0.4        | -5                      |
| K169A                               | 41±0.6        | -7                      | 55±0.3        | -1                      | 62±0.7        | -5                      |
| R277S                               | 36±1.4        | -12                     | 51±0.9        | -5                      | 63±0.4        | -4                      |
| Y331S                               | 40±0.9        | -8                      | 61±0.3        | -5                      | 68±0.2        | +1                      |
| D332E                               | 35±5.8        | -13                     | 51±3.1        | -5                      | 62±1.1        | -5                      |
| K294A                               | 35±0.6        | -13                     | 47±0.7        | -9                      | 57±0.5        | -10                     |
| V322D                               | 34±1.9        | -14                     | 47±0.6        | -9                      | 58±0.2        | -9                      |
| Y389D                               | 32±3.8        | -16                     | 48±2.4        | -8                      | 56±0.4        | -11                     |
| Y331S/Y389D                         | 35±0.7        | -13                     | 46±0.1        | -10                     | 55±0.1        | -12                     |
| Y331S/Y389D/R277S                   | 38±1.6        | -10                     | 45±0.2        | -11                     | 54±0.1        | -13                     |
| Y331S/Y389D/R277S/D332E             | 37±0.3        | -11                     | 48±0.2        | -8                      | 56±0.1        | -11                     |
| Y331S/Y389D/R277S/D332E/V322D       | -             | -                       | 40±0.2        | -17                     | 50±0.2        | -17                     |
| Y331S/Y389D/R277S/D332E/V322D/D134A | -             | -                       | 44±0.6        | -12                     | 59±0.9        | -8                      |
| AZI                                 | -             | -                       | 45±0.02       | -                       | 55±0.3        | -                       |

The  $T_m$  value was derived from the DSC scanning data shown in Figure 5, Figure 6 and Figure S2.

$\Delta T_{m(WT-mut)}$  refers to the difference in  $T_m$  values between the WT and mutant.

doi:10.1371/journal.pone.0104865.t003

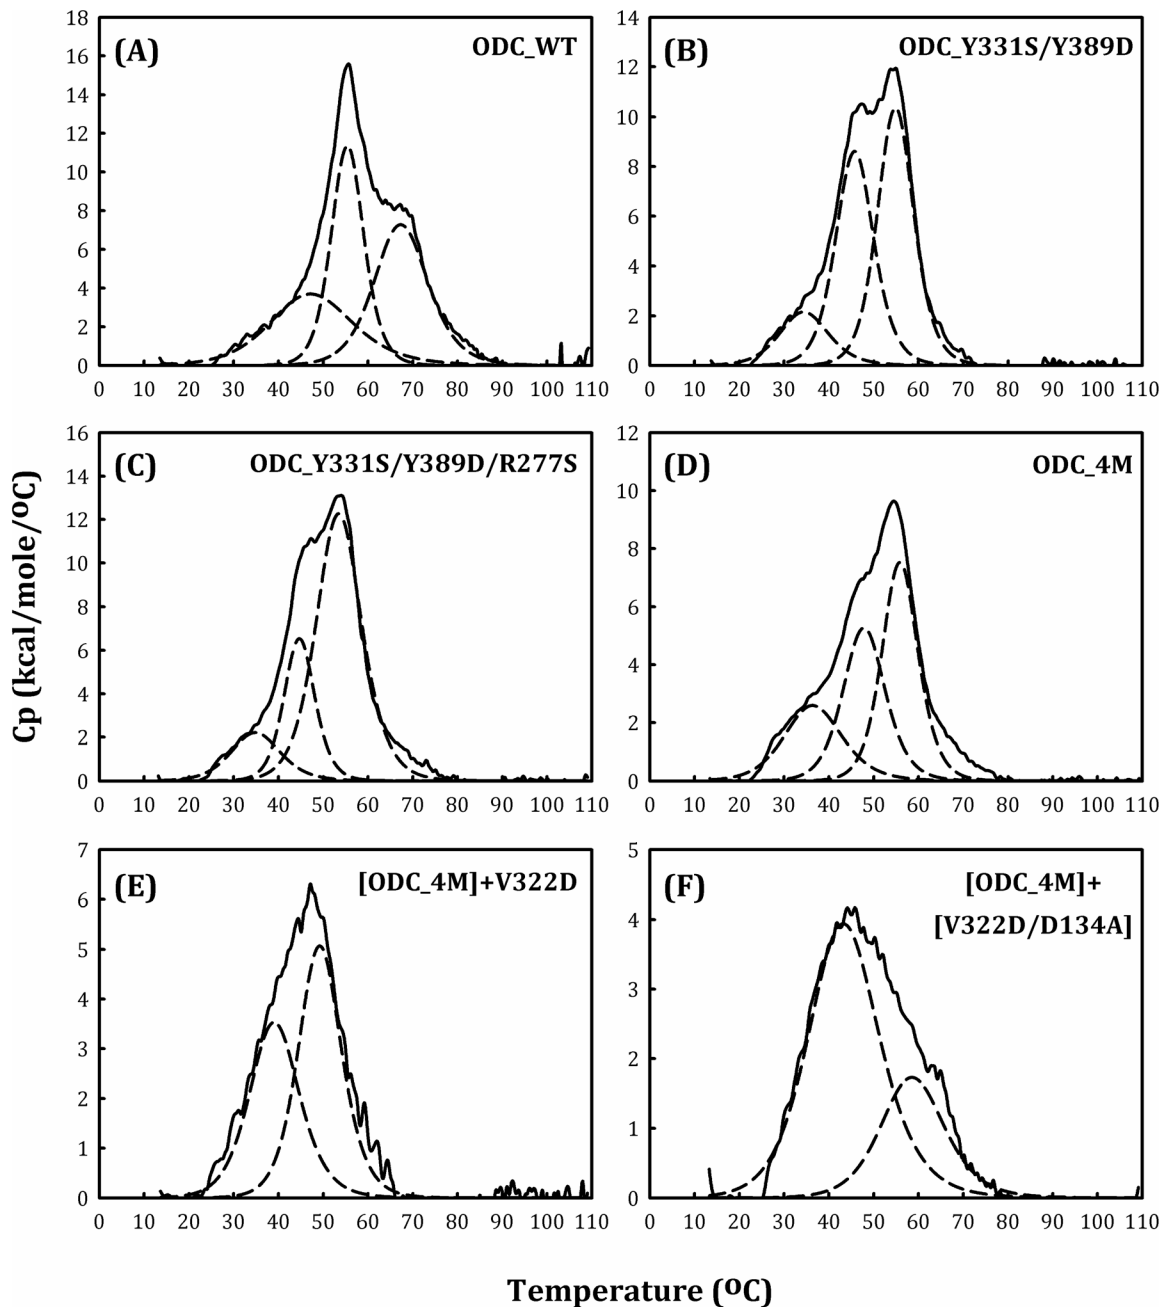

**Figure 6. DSC scanning plot of the human ODC\_WT and multiple mutants.** The protein concentration was 0.75 mg/ml in 30 mM sodium acetate buffer (pH 7.0). (A) ODC\_WT; (B) ODC\_Y331S/Y389D; (C) ODC\_Y331S/Y389D/R277S; (D) ODC\_Y331S/Y389D/R277S/D332E (ODC\_4M); (E) [ODC\_4M]+V322D; and (F) [ODC\_4M]+[V322D/D134A].

doi:10.1371/journal.pone.0104865.g006

### Dimer-interface residues are important for ODC enzyme activity and protein stability

Some of the dimer-interface residues are critical for enzyme catalysis, and mutation of these residues results in loss of enzyme catalysis. Previous studies have shown the importance of Arg277 and Tyr389 in the binding of the cofactor PLP [28,34]. Thus, it is not surprising that R277S and Y389D show limited enzyme activity (Table 1). In addition, the  $K_d$  value of Y389D is 6.9-fold larger than that of the WT, suggesting its role in the dimerization of ODC. In the DSC study, all three  $T_m$  values of the Y389D enzyme were notably lower than those of the WT. Therefore,

Tyr389 may play a role not only in the binding of PLP but also in dimer formation and structural stability.

Tyr331 and Val322 reside at the dimer interface, and mutations of these two residues, especially the V322D mutation, make the enzyme less active. It is believed that Tyr331 and Val322 do not directly participate in enzyme catalysis. The loss of enzyme activity may be attributed to a small change at the dimer interface because the  $K_d$  values of Y331S and V322D are 11- and 5.6-fold larger than that of the WT. Similarly, Asp134, Lys169 and Lys294 are not catalytic residues and are located far from the active site of ODC. However, mutating these residues is notably detrimental to



enzyme activity. In particular, D134A showed limited catalytic activity. Indeed, D134A, K169A, K294A, V322D and Y389D show negligible enzyme activity and markedly low  $T_m$  values, although their dimeric structures are mostly retained. These results indicate that these interface residues are required for the proper conformation of the dimer interface and are critical for enzymatic activity.

In summary, according to the above results, we suggest that drugs that are capable of binding to the dimer interface or interfering with dimerization of the enzyme may have potential as novel ODC inhibitors. Our studies provide information for the rational drug design of ODC inhibitors that bind to the dimer interface with high affinity.

## Materials and Methods

### Expression and purification of recombinant wild-type and mutant human ODC

Human ODC cDNA was cloned into the pQE30 vector (Qiagen, Hilden, Germany), which carries an N-terminal His<sub>6</sub>Tag sequence useful for purifying overexpressed proteins, and the expression vectors were transfected into the JM109 strain of *Escherichia coli*. Protein expression was induced with 1.0 mM isopropyl-1-thio- $\beta$ -D-galactoside (IPTG), and the cells were grown at 25°C overnight. Before purification, the cell pellets were dissolved in 25 ml of binding buffer (5 mM imidazole, 500 mM sodium chloride, 30 mM Tris-HCl, pH 7.6) with 2 mM  $\beta$ -mercaptoethanol, 2 mM phenylmethylsulfonyl fluoride (PMSF) and 0.2% Triton X-100. HIS-Select Nickel Affinity Gel (Sigma, St Louis, MO) was used to purify the ODC protein. For the column, 2 ml of the affinity gel was first equilibrated with the binding buffer and then mixed with the cell lysate at 4°C for 30 min. Then, the lysate-Ni-gel mixture was washed with 100 ml of binding buffer and wash buffer (10 mM imidazole, 500 mM sodium chloride and 30 mM Tris-HCl, pH 7.6) to remove unwanted proteins. Finally, the target proteins were removed with elution buffer (250 mM imidazole, 500 mM sodium chloride and 2 mM  $\beta$ -mercaptoethanol in 30 mM Tris-HCl, pH 7.6). After a stepwise wash process, the proteins were eluted and concentrated for subsequent experiments. The purity of all recombinant proteins was determined with SDS-PAGE.

### Site-directed mutagenesis

Site-directed mutagenesis was performed using a QuikChange Kit (Stratagene, La Jolla, CA). This mutagenesis method uses *Pfu* DNA polymerase, which replicates both plasmid strands with high fidelity in a 16–20 cycle PCR reaction. Primers 35–45 bases in length that included the desired mutations were used to specifically amplify the template DNA. The sequences of the mutagenic primers used in this study were as follows:

R165E: 5'-GATGATCCAAAGCAGTCTGTGAACTCAGTGTGAAATTCGGTGCC-3'; D134A: 5'-GAGTCCAGTAGATGACTTTTTGCGAGTGAAGTTGAGTTGATG-3'; K169A: 5'-CTGTCCGTCAGTGTGGCGTTCCGGTGCCACGCTC-3'; R277S: 5'-GCTGAGCCCGCCAGCTACTATGTTGCATC-3'; Y331S: 5'-CATTTAATTGCATACTCTCTGACCCACGCA-CATGTAAAGC-3'; D332E: 5'-TAATTGCATACTCTATGAGCAGCACATGTAAAGCCC-3'; K294A: 5'-GTTAATATCATTGCCAAGCGATTGTATTAAGGAACAGACGGG-C-3'; V322D: 5'-GTATTATGTGAATGATGGCGACTATGATCATTTAATTGC-3'; Y389D: 5'-GAAAACATGGGCGCTGACACTGTTGCTGCT-3'; and Y331S/D332E: 5'-CATTTAATTGCATACTCTCTGAGCAGCACATGTAAAGCC-CCTTC-3'.

The PCR cycling conditions were as follows: 20 cycles of 95°C for 30 sec, 55°C for 1 min and 68°C for a period equivalent to 2 min/kb of plasmid length. The PCR products were then treated with DpnI to digest the WT human ODC templates. Finally, the nicked DNA with the desired mutations was transfected into the XL-1 *E. coli* strain (Stratagene, La Jolla, CA), and the DNA sequences were checked by autosequencing.

### Enzyme assay and kinetic analysis

The decarboxylase activity of ODC was measured with a CO<sub>2</sub>-L3K assay kit (DCL, Charlottetown, Canada) at 310 K. For continuous measurement of the ODC enzyme activity, the decarboxylation of ornithine was coupled to the carboxylation of phosphoenolpyruvate (PEP) to form oxaloacetate (OAA), which becomes malate following NADH oxidation, according to a previously published protocol [51]. To determine the  $K_m$  ornithine and  $k_{cat}$  values, the reaction mixture contained various concentrations of ornithine, 0.2 mM PLP, 30 mM Tris-HCl (pH 7.8) and 0.4 ml of CO<sub>2</sub>-L3K assay buffer (12.5 mM phosphoenolpyruvate, 0.4 unit/ml microbial phosphoenolpyruvate carboxylase, 4.1 units/ml mammalian malate dehydrogenase and 0.6 mM NADH analog) at a final volume of 0.5 ml. The reaction commenced when the ODC enzyme was added to the assay mixture; simultaneously, the decrease in the absorbance at 405 nm was continuously recorded with a Perkin-Elmer Lambda-25 spectrophotometer. Using this coupled assay method under these conditions, 1 mol of CO<sub>2</sub> was formed, and 1 mol of NADH analog was oxidized. An absorption coefficient of 2,410 cm<sup>-1</sup> M<sup>-1</sup> was used for the NADH analog in the calculations. All calculations were performed with Sigma Plot 10.0 software (Jandel, San Rafael, CA).

### Size distribution analysis by analytical ultracentrifugation (AUC)

Sedimentation velocity experiments were conducted using a Beckman Optima XL-A analytical ultracentrifuge. Sample (380  $\mu$ l) and buffer (400  $\mu$ l) solutions were separately loaded into the double sector centerpiece and set up in a Beckman An-50 Ti rotor. The experiments were performed at 293 K with a rotor speed of 42,000 rpm. The protein samples were monitored using the UV absorbance at 280 nm in continuous mode, with a time interval of 420 s and a step size of 0.002 cm. Multiple scans at different time points were fitted to a continuous size distribution model using the program SEDFIT [52–55]. All size distributions were solved at a confidence level of  $p = 0.95$ , a best-fit average anhydrous frictional ratio ( $f/f_0$ ) and a resolution  $N$  of 200 sedimentation coefficients between 0.1 and 20.0 S.

To precisely determine the dissociation constants, sedimentation velocity experiments were performed at three different protein concentrations for both WT and mutant ODC: 0.3, 0.6 and 0.9 mg/ml in 50 mM Tris-HCl buffer (pH 7.5). The AUC scans were performed at 293 K. To calculate the dissociation constants ( $K_d$ ), all sedimentation data were globally fit to a monomer-dimer equilibrium model using the program SEDPHAT [54]. The partial specific volumes of the proteins, the solvent densities and the viscosity were calculated by the software program SEDN-TERP [56].

### Measurement of protein stability by differential scanning calorimetry (DSC)

The DSC experiments were performed using a MicroCal VP-DSC (GE Healthcare). ODC WT and mutant proteins were used in these DSC scans at a concentration of 0.75 mg/ml in 30 mM

acetate buffer (pH 7.0). The samples were scanned from approximately 283 K to 383 K at a heating rate of 1 K per min. In all experiments, the reference cell of the calorimeter was filled with a buffer equivalent to the sample buffer. The baseline buffer values were subtracted from the protein scans, and the molar heat capacity was used in the data analysis. Origin scientific plotting software (GE Healthcare) was utilized to analyze all DSC data. Before the DSC curve was fitted, the left and right linear line segments were assigned to create the progress baseline. After the data were normalized, curve fitting was performed with adequate models provided by Origin software. In this case, the unfolding curves were analyzed by a non-two-state transition model, which obeys the Levenberg/Marquardt (LM) non-linear least square method. Based on the calorimetric profiles, two or three peaks were assigned to facilitate the data fit. Up to 100 LM iterations and 100 simplex iterations were alternatively performed during the fitting cycles. Finally, best fit was observed when the chi square value could no longer be reduced. In this manner, the melting temperatures were acquired.

## References

- Pegg AE, McCann PP (1982) Polyamine metabolism and function. *Am J Physiol* 243: C212–221.
- Gerner EW, Meyskens FL Jr (2004) Polyamines and cancer: old molecules, new understanding. *Nat Rev Cancer* 4: 781–792.
- Seiler N, Atanasov CL, Raul F (1998) Polyamine metabolism as target for cancer chemoprevention (Review). *Int J Oncol* 13: 993–1006.
- Palanimurugan R, Scheel H, Hofmann K, Dohmen RJ (2004) Polyamines regulate their synthesis by inducing expression and blocking degradation of ODC antizyme. *EMBO J* 23: 4857–4867.
- Pegg AE (2006) Regulation of ornithine decarboxylase. *J Biol Chem* 281:14529–14532.
- Auvinen M, Paasinen A, Andersson LC, Holtta E (1992) Ornithine decarboxylase activity is critical for cell transformation. *Nature* 360: 355–358.
- Thomas T, Thomas TJ (2001) Polyamines in cell growth and cell death: Molecular mechanisms and therapeutic applications. *Cell Mol Life Sci* 58:244–258.
- Pendeville H, Carpino N, Marine JC, Takahashi Y, Muller M, et al. (2001) The ornithine decarboxylase gene is essential for cell survival during early murine development. *Mol Cell Biol* 21:6549–6558.
- Liu GY, Hung YC, Hsu PC, Liao YF, Chang WH, et al. (2005) Ornithine decarboxylase prevents tumor necrosis factor alpha-induced apoptosis by decreasing intracellular reactive oxygen species. *Apoptosis* 10:569–581.
- Huang CC, Hsu PC, Hung YC, Liao YF, Liu CC, et al. (2005) Ornithine decarboxylase prevents methotrexate-induced apoptosis by reducing intracellular reactive oxygen species production. *Apoptosis* 10:895–907.
- Hsu PC, Hour CT, Liao YF, Hung YC, Liu CC, et al. (2006) Increasing ornithine decarboxylase activity is another way of prolactin preventing methotrexate-induced apoptosis: Crosstalk between ODC and BCL-2. *Apoptosis* 11:389–399.
- Hayashi S, Kameji T, Fujita K, Murakami Y, Kanamoto R, et al. (1985) Molecular mechanism for the regulation of hepatic ornithine decarboxylase. *Adv Enzyme Regul* 23: 311–329.
- Medina MA, Quesada AR, Nunez de Castro I, Sanchez-Jimenez F (1999) Histamine, polyamines, and cancer. *Biochem Pharmacol* 57:1341–1344.
- Thomson SC, Deng A, Bao D, Satriano J, Blantz RC, et al. (2001) Ornithine decarboxylase, kidney size, and the tubular hypothesis of glomerular hyperfiltration in experimental diabetes. *J Clin Invest* 107:217–224.
- Furumitsu Y, Yukioka K, Yukioka M, Ochi T, Morishima Y, et al. (2000) Interleukin-1beta induces elevation of spermidine/spermine N1-acetyltransferase activity and an increase in the amount of putrescine in synovial adherent cells from patients with rheumatoid arthritis. *J Rheumatol* 27:1352–1357.
- Hsu HC, Thomas T, Sigal LH, Thomas TJ (1999) Polyamine-fas interactions: inhibition of polyamine biosynthesis in MRL-lpr/lpr mice is associated with the up-regulation of fas mRNA in thymocytes. *Autoimmunity* 29:299–309.
- Schluter KD, Frischkopf K, Flesch M, Rosenkranz S, Taimor G, et al. (2000) Central role for ornithine decarboxylase in beta-adrenoceptor mediated hypertrophy. *Cardiovasc Res* 45:410–417.
- Morrison LD, Cao XC, Kish SJ (1998) Ornithine decarboxylase in human brain: influence of aging, regional distribution, and Alzheimer's disease. *J Neurochem* 71:288–294.
- Park JK, Chung YM, Kang S, Kim JU, Kim YT, et al. (2002) c-Myc exerts a protective function through ornithine decarboxylase against cellular insults. *Mol Pharmacol* 62:1400–1408.
- Smit MK, Goral MA, Wright JH, Matrisian LM, Morris RJ, et al. (1997) Ornithine decarboxylase overexpression leads to increased epithelial tumor invasiveness. *Cancer Res* 57: 2104–2108.
- O'Brien TG, Megosh LC, Gilliard G, Soler AP (1997) Ornithine decarboxylase overexpression is a sufficient condition for tumor promotion in mouse skin. *Cancer Res* 57: 2630–2637.
- Tabor CW, Tabor H (1984) Polyamines. *Annu Rev Biochem* 53: 749–790.
- Kern AD, Oliveira MA, Coffino P, Hackert ML (1999) Structure of mammalian ornithine decarboxylase at 1.6 Å resolution: stereochemical implications of PLP-dependent amino acid decarboxylases. *Structure Fold Des* 7: 567–581.
- Almud JJ, Oliveira MA, Kern AD, Grishin NV, Phillips MA, et al. (2000) Crystal structure of human ornithine decarboxylase at 2.1 Å Resolution: Structural Insights to Antizyme Binding. *J Mol Biol* 295: 7–16.
- Solano F, Penafiel R, Solano ME, Lozano JA (1985) Equilibrium between active and inactive forms of rat liver ornithine decarboxylase mediated by L-ornithine and salts. *FEBS Lett* 190: 324–328.
- Myers DP, Jackson LK, Ipe VG, Murphy GE, Phillips MA (2001) Long-range interactions in the dimer interface of ornithine decarboxylase are important for enzyme function. *Biochemistry* 40:13230–13236.
- Osterman AL, Kinch LN, Grishin NV, Phillips MA (1995) Acidic residues important for substrate binding and cofactor reactivity in eukaryotic ornithine decarboxylase identified by alanine scanning mutagenesis. *J Biol Chem* 270: 11797–11802.
- Osterman AL, Brooks HB, Rizo J, Phillips MA (1997) Role of Arg-277 in the binding of pyridoxal 5'-phosphate to *Trypanosoma brucei* ornithine decarboxylase. *Biochemistry* 36: 4558–4567.
- Coleman CS, Stanley BA, Pegg AE (1993) Effect of mutations at active site residues on the activity of ornithine decarboxylase and its inhibition by active site-directed irreversible inhibitors. *J Biol Chem* 268: 24572–24579.
- Coleman CS, Stanley BA, Viswanath R, Pegg AE (1994) Rapid exchange of subunits of mammalian ornithine decarboxylase. *J Biol Chem* 269: 3155–3158.
- Tsirka S, Coffino P (1992) Dominant negative mutants of ornithine decarboxylase. *J Biol Chem* 267: 23057–23062.
- Tobias KE, Kahana C (1993) Inter-subunit location of the active site of mammalian ornithine decarboxylase as determined by hybridization of site-directed mutants. *Biochemistry* 32: 5842–5847.
- Jackson LK, Baldwin J, Akella R, Goldsmith EJ, Phillips MA (2004) Multiple active site conformations revealed by distant site mutation in ornithine decarboxylase. *Biochemistry* 43: 12990–12999.
- Jackson LK, Goldsmith EJ, Phillips MA (2003) X-ray structure determination of *Trypanosoma brucei* ornithine decarboxylase bound to D-ornithine and to G418: insights into substrate binding and ODC conformational flexibility. *J Biol Chem* 278: 22037–43.
- Mangold U (2005) The antizyme family: polyamines and beyond. *IUBMB Life* 57: 671–676.
- Murakami Y, Matsufuji S, Kameji T, Hayashi S, Igarashi K, et al. (1992) Ornithine decarboxylase is degraded by the 26S proteasome without ubiquitination. *Nature* 360: 597–600.

## Supporting Information

**Figure S1** Continuous sedimentation coefficient distribution of the human ODC\_WT and various single dimer-interface mutants. (A) ODC\_WT; (B) ODC\_D35G; (C) ODC\_D134A; (D) ODC\_R165E; (E) ODC\_K169A; (F) ODC\_R277S; (G) ODC\_K294A; (H) ODC\_V322D; (I) ODC\_D332E; (J) ODC\_Y389D. M, monomer; D, dimer. (TIF)

**Figure S2** DSC scanning plot of the human ODC\_WT and single mutants. The protein concentration was 0.75 mg/ml in 30 mM sodium acetate buffer (pH 7.0). (A) ODC\_WT; (B) ODC\_R165E; (C) ODC\_D134A; (D) ODC\_K169A; (E) ODC\_R277S; (F) ODC\_Y331S; (G) ODC\_D332E; (H) ODC\_K294A; (I) ODC\_V322D; (J) ODC\_Y389D. (TIF)

## Author Contributions

Conceived and designed the experiments: HCH GYL. Performed the experiments: CYL YLL. Analyzed the data: CYL YLL HCH GYL. Contributed reagents/materials/analysis tools: CLL. Contributed to the writing of the manuscript: HCH.

37. Hayashi S, Murakami Y, Matsufuji S (1996) Ornithine decarboxylase antizyme: A novel type of regulatory protein. *Trends Biochem Sci* 21: 27–30.
38. Zhang M, Pickart CM, Coffino P (2003) Determinants of proteasome recognition of ornithine decarboxylase, a ubiquitin independent substrate. *EMBO J* 22: 1488–1496.
39. Zhang M, MacDonald A, Hoyt MA, Coffino P (2004) Proteasomes begin ornithine decarboxylase digestion at the C-terminus. *J Biol Chem* 279: 20959–20965.
40. Li X, Coffino P (1992) Regulated degradation of ornithine decarboxylase requires interaction with the polyamine-inducible protein antizyme. *Mol Cell Biol* 12: 3556–3562.
41. Mitchell JL, Chen HJ (1990) Conformational changes in ornithine decarboxylase enable recognition by antizyme. *Biochim Biophys Acta* 1037: 115–121.
42. Coffino P (2001) Antizyme, a mediator of ubiquitin-independent proteasomal degradation. *Biochimie* 83: 319–323.
43. Coffino P (2001) Regulation of cellular polyamines by antizyme. *Nat Rev Mol Cell Biol* 2: 188–194.
44. Sakata K, Kashiwagi K, Igarashi K (2000) Properties of a polyamine transporter regulated by antizyme. *Biochem J* 347: 297–303.
45. Hsieh JY, Yang JY, Lin CL, Liu GY, Hung HC (2011) Minimal antizyme peptide fully functioning in the binding and inhibition of ornithine decarboxylase and antizyme inhibitor. *PLoS ONE* 6(9): e24366. doi:10.1371/journal.pone.0024366
46. Murakami Y, Ichiba T, Matsufuji S, Hayashi S (1996) Cloning of antizyme inhibitor, a highly homologous protein to ornithine decarboxylase. *J Biol Chem* 271: 3340–3342.
47. Nilsson J, Grahn B, Heby O (2000) Antizyme inhibitor is rapidly induced in growth-stimulated mouse fibroblasts and releases ornithine decarboxylase from antizyme suppression. *Biochem J* 346: 699–704.
48. Liu YC, Liu YL, Su JY, Liu GY, Hung HC (2011) Critical Factors Governing the Difference in Antizyme-Binding Affinities between Human Ornithine Decarboxylase and Antizyme Inhibitor. *PLoS ONE* 6(4): e19253. doi:10.1371/journal.pone.0019253
49. Su KL, Liao YF, Hung HC, Liu GY (2009) Critical factors determining dimerization of human antizyme inhibitor. *J Biol Chem* 284: 26768–26777.
50. Albeck S, Dym O, Unger T, Snapir Z, Bercovich Z, et al. (2008) Crystallographic and biochemical studies revealing the structural basis for antizyme inhibitor function. *Protein Sci* 17: 793–802.
51. Liu YC, Hsu DH, Huang CL, Liu GY, Hung HC (2011) Determinants of the Differential Antizyme-Binding Affinity of Ornithine Decarboxylase. *PLoS ONE* 6(11): e26835. doi:10.1371/journal.pone.0026835
52. Schuck P (2000) Size-distribution analysis of macromolecules by sedimentation velocity ultracentrifugation and Lamm equation modeling. *Biophys J* 78: 1606–1619.
53. Lebowitz J, Lewis MS, Schuck P (2002) Modern analytical ultracentrifugation in protein science: a tutorial review. *Protein Sci* 11: 2067–2079
54. Schuck P (2003) On the analysis of protein self-association by sedimentation velocity analytical ultracentrifugation. *Anal Biochem* 320: 104–124.
55. Schuck P, Perugini MA, Gonzales NR, Howlett GJ, Schubert D (2002) Size distribution analysis of proteins by analytical ultracentrifugation: strategies and application to model systems. *Biophys J* 82: 1096–1111.
56. Laue TM, Shah BD, Ridgeway TM, Pelleter SL (1992) *Analytical Ultracentrifugation in Biochemistry and Polymer Science*, The Royal Society of Chemistry, Cambridge, UK
57. DeLano WL (2004) *The PyMOL Molecular Graphics System*, 1.5.0.4 ed. Schrödinger, LLC.
